# Supplementary material
Source: MDPI journal article supplement (https://www.mdpi.com/2313-4321/9/2/30)
Supplement: s1 [file s1]

Archive with 1 entries (1 files):
- recycling-2924762-supplementary.pdf
